# Supplementary material for: Deep learning approach for predicting functional Z-DNA regions using omics data
Source: PubMed Central journal article supplement (PMC7644757; doi:10.1038/s41598-020-76203-1), 2020-11-05

# Deep learning approach for predicting functional Z-DNA regions using omics data

Nazar Beknazarov, Seungmin Jin and Maria Poptsova

**Supplementary Figure S1.** Distribution of DeepZ predicted Z-DNA regions over genomic regions. A. DeepZ trained on Shin data set. B. DeepZ trained on Kouzin-Wu dataset.

A DeepZ Shin

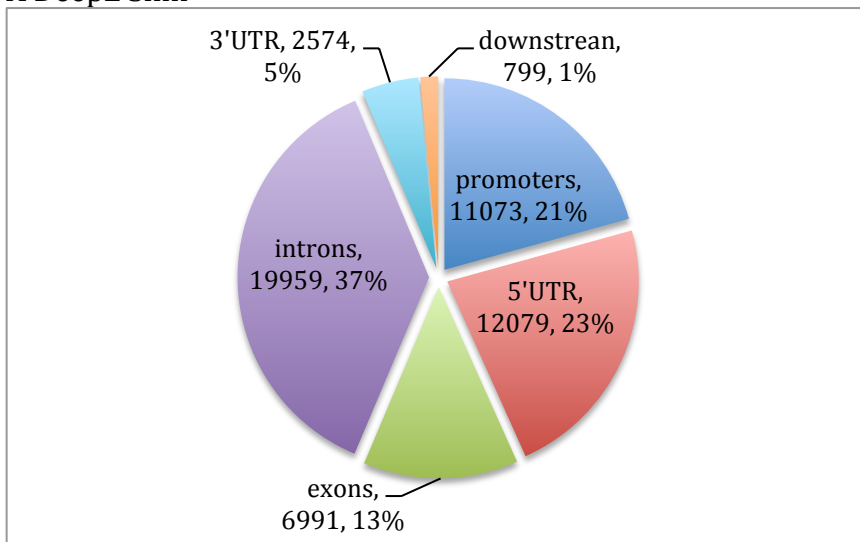

B DeepZ Kouzin-Wu

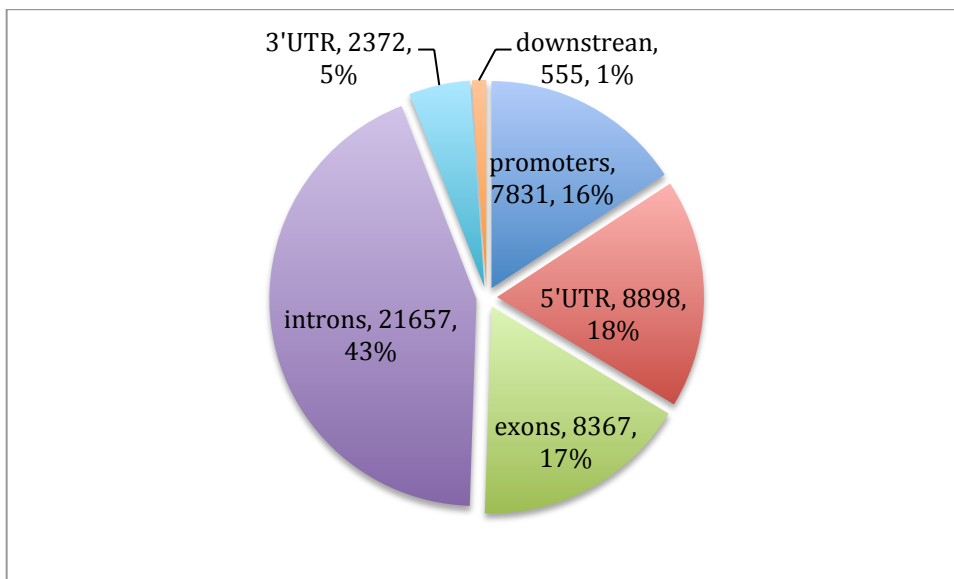

Supplement: 41598_2020_76203_MOESM1_ESM.pdf [file 41598_2020_76203_MOESM1_ESM.pdf]
