# Supplementary material for: Deep learning approach for predicting functional Z-DNA regions using omics data
Source: PubMed Central journal article supplement (PMC7644757; doi:10.1038/s41598-020-76203-1), 2020-11-05

# Deep learning approach for predicting functional Z-DNA regions using omics data

Nazar Beknazarov, Seungmin Jin and Maria Poptsova

**Supplementary Figure S2.** GO enrichment analysis of genes with predicted Z-DNA regions in gene bodies (see Supplementary Table S2 for a list of genes in each category); (A) network representation (B) tree representation.

A

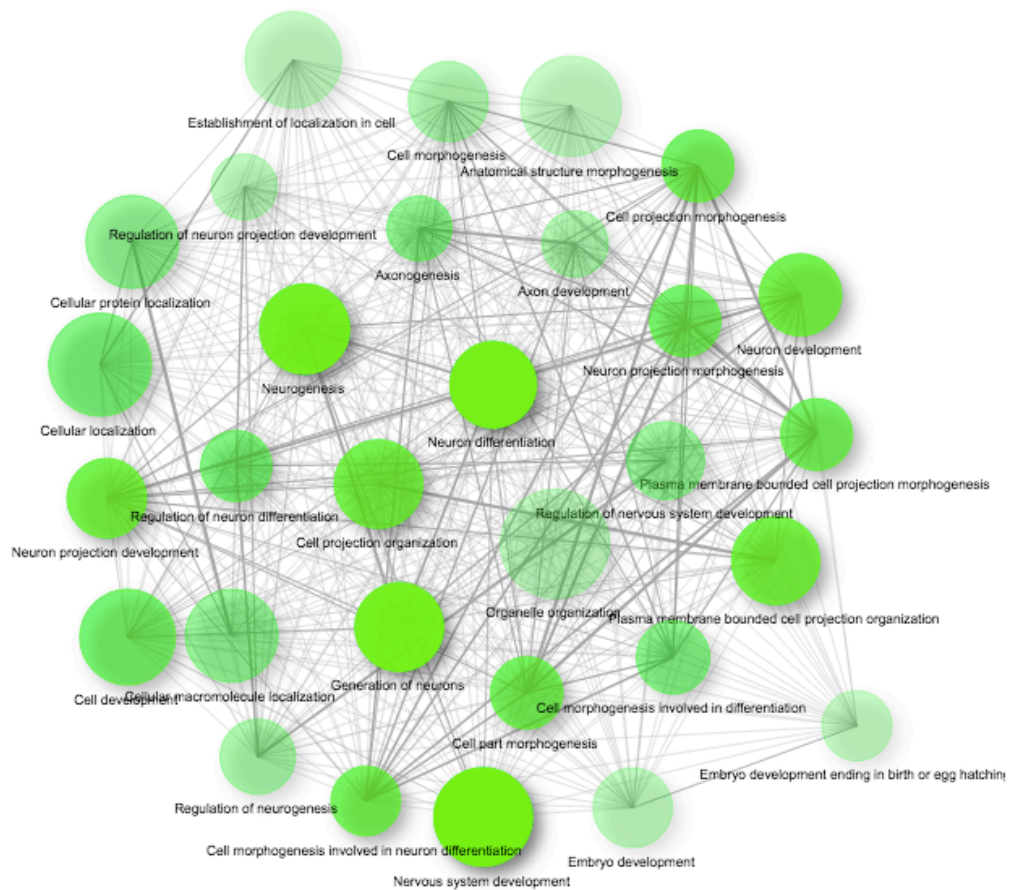

B

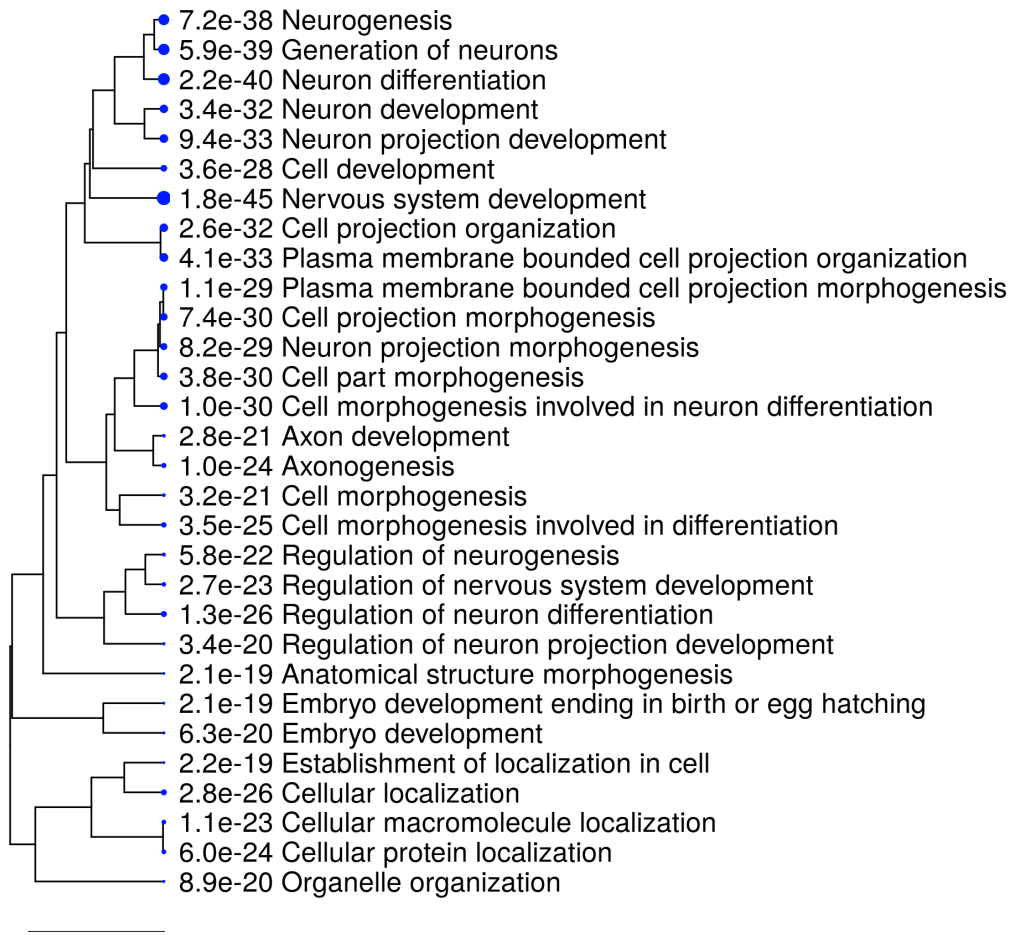

Supplement: 41598_2020_76203_MOESM2_ESM.pdf [file 41598_2020_76203_MOESM2_ESM.pdf]
