# Supplementary material for: Deep learning approach for predicting functional Z-DNA regions using omics data
Source: PubMed Central journal article supplement (PMC7644757; doi:10.1038/s41598-020-76203-1), 2020-11-05
Supplement: 41598_2020_76203_MOESM3_ESM.pdf [file 41598_2020_76203_MOESM3_ESM.pdf]

# Deep learning approach for predicting functional Z-DNA regions using omics data

Nazar Beknazarov, Seungmin Jin and Maria Poptsova

**Supplementary Figure S3.** Examples of DeepZ, ZHUNT and Chip-Seq Z-DNA predictions. More examples can be found at <https://github.com/Nazar1997/DeepZ>.

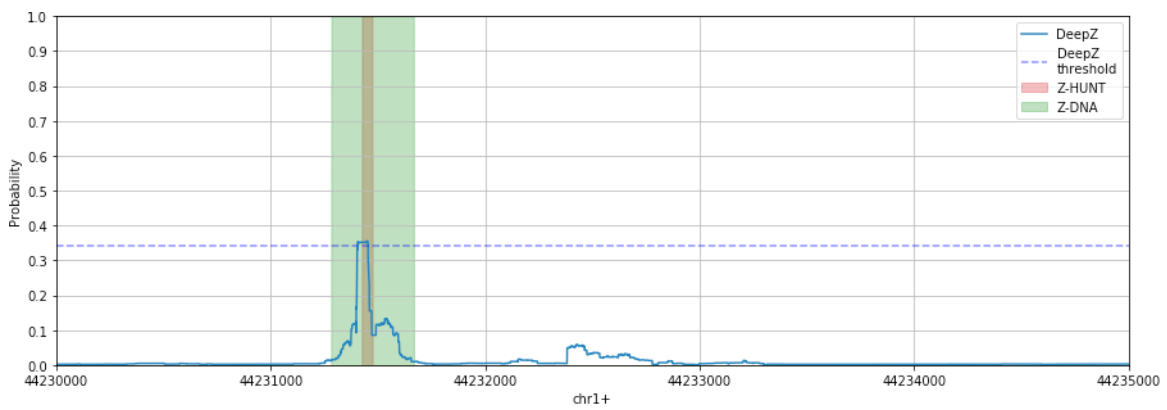

chr1\_44230000-44235000

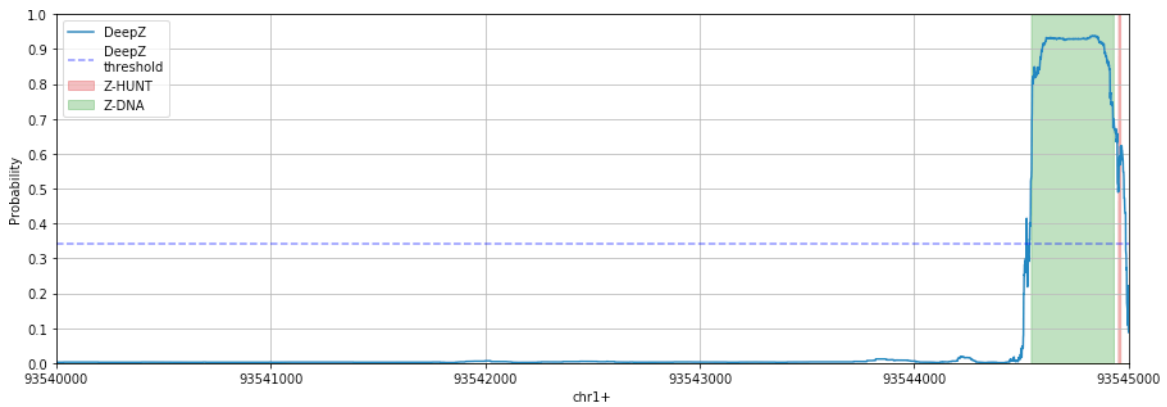

chr1\_93540000-93545000

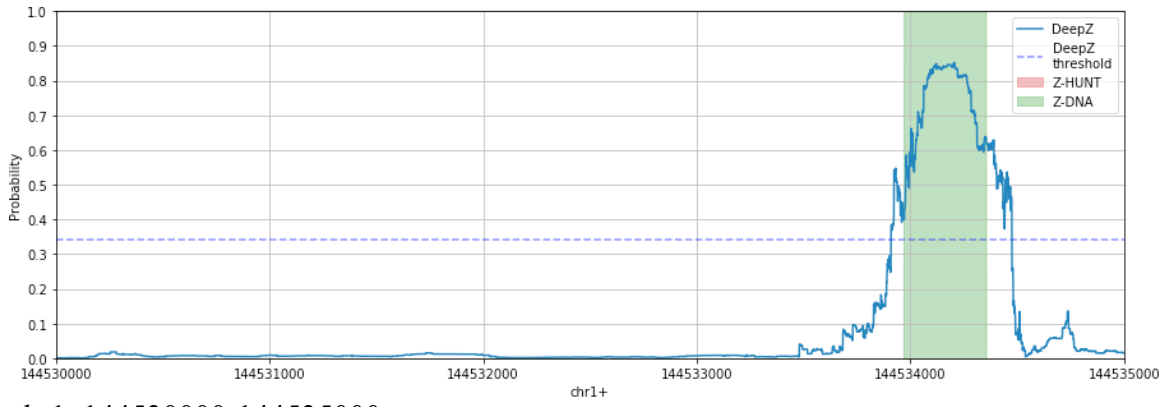

chr1\_144530000-144535000

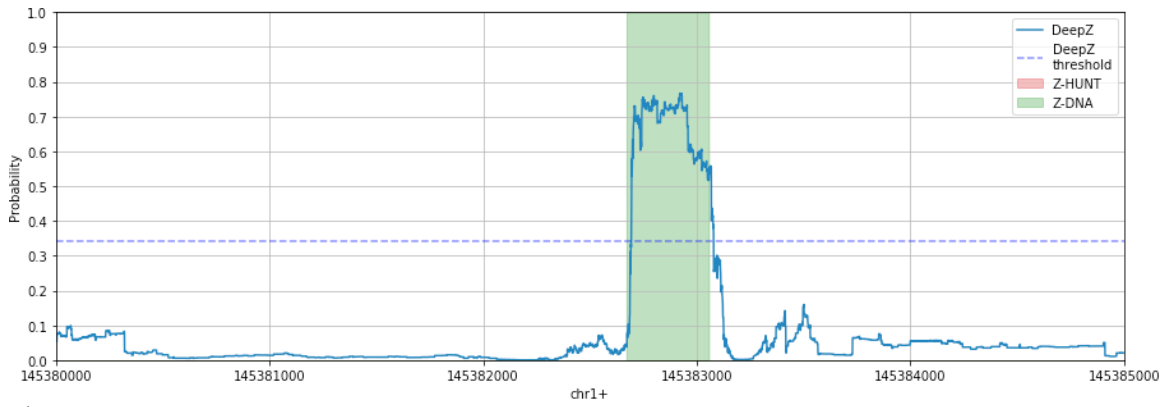

chr1\_145380000-145385000

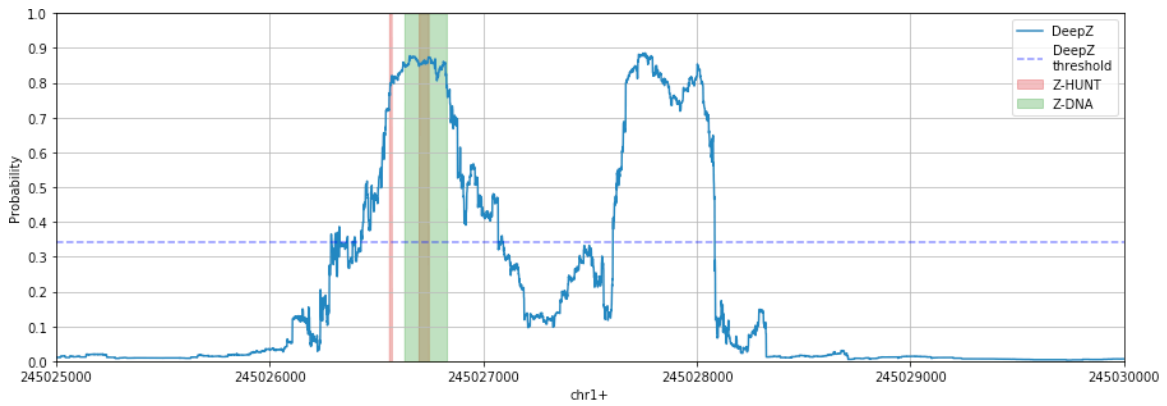

chr1\_245025000-245030000

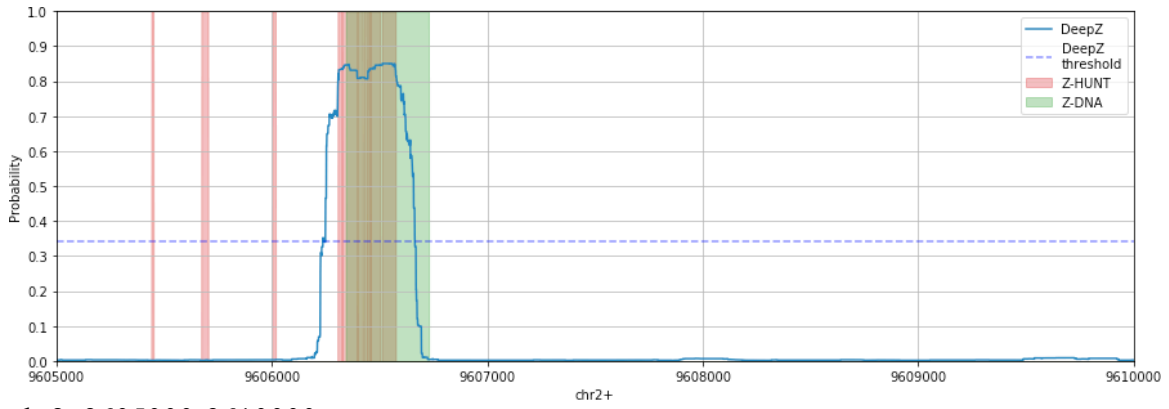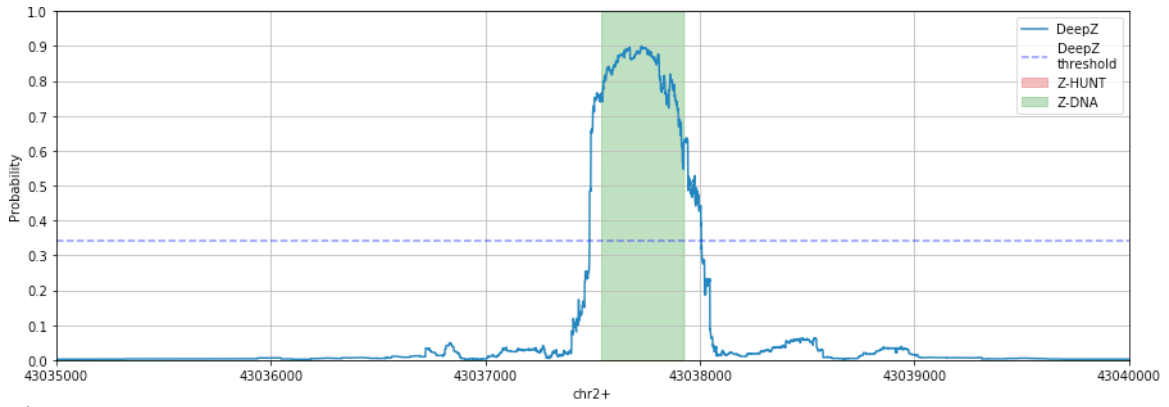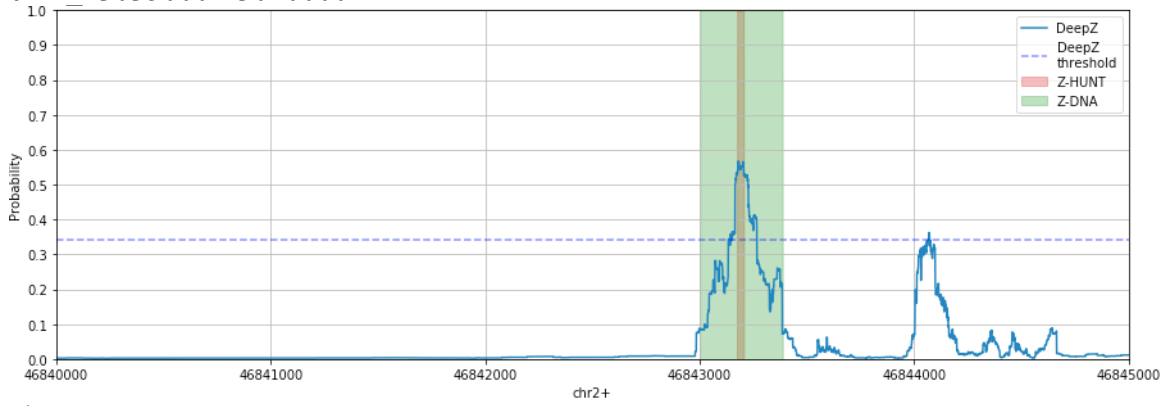

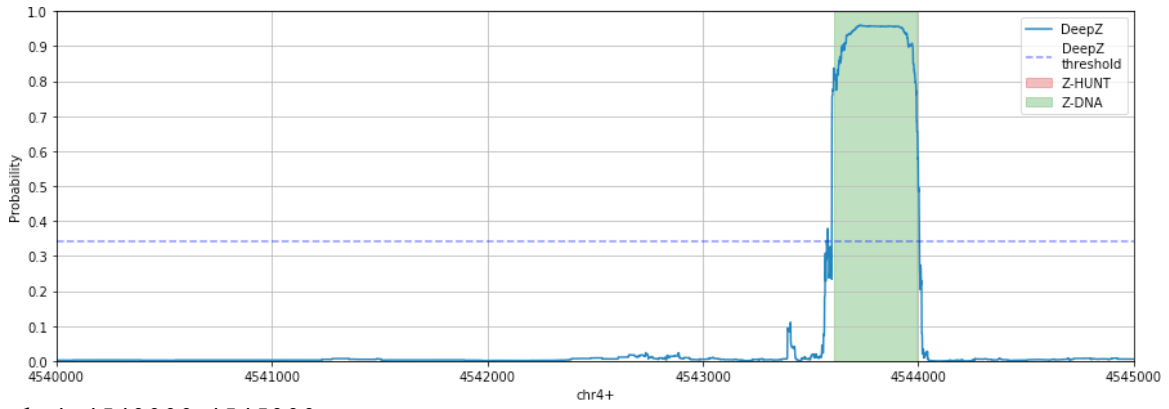

chr4\_4540000-4545000

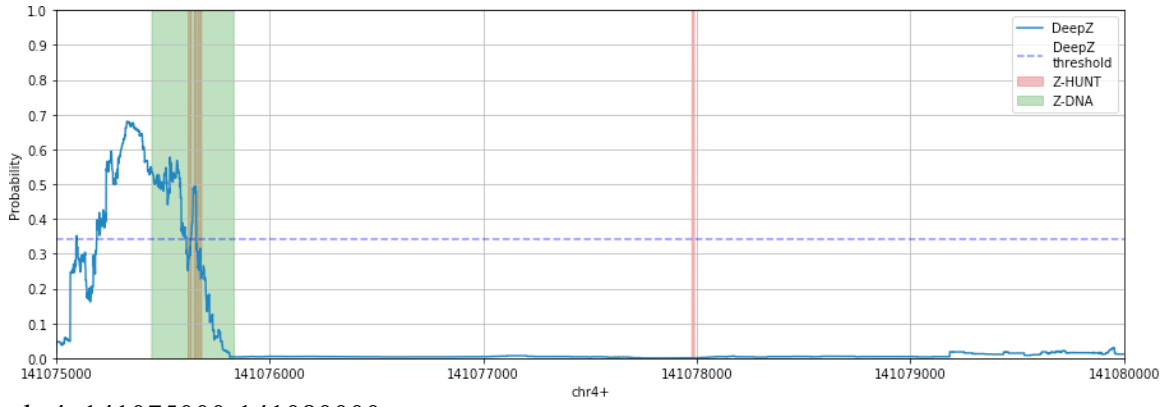

chr4\_141075000-141080000

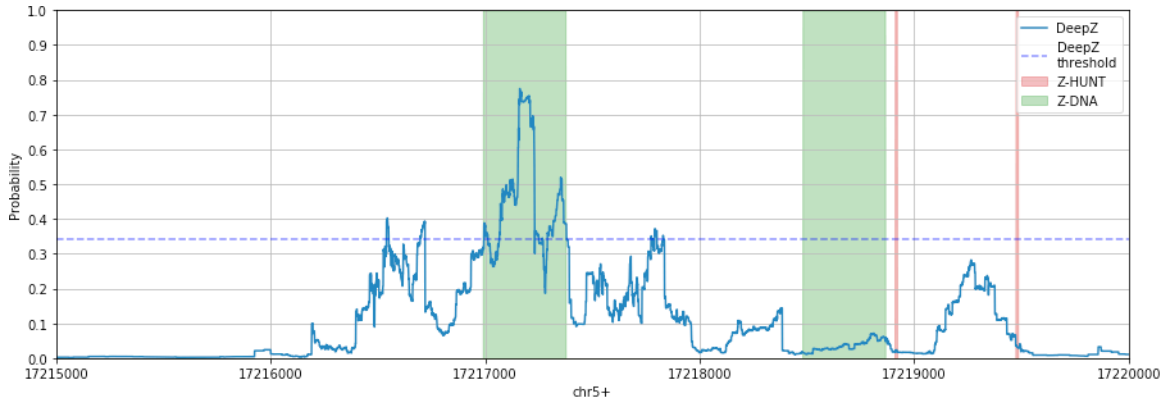

chr5\_17215000-17220000

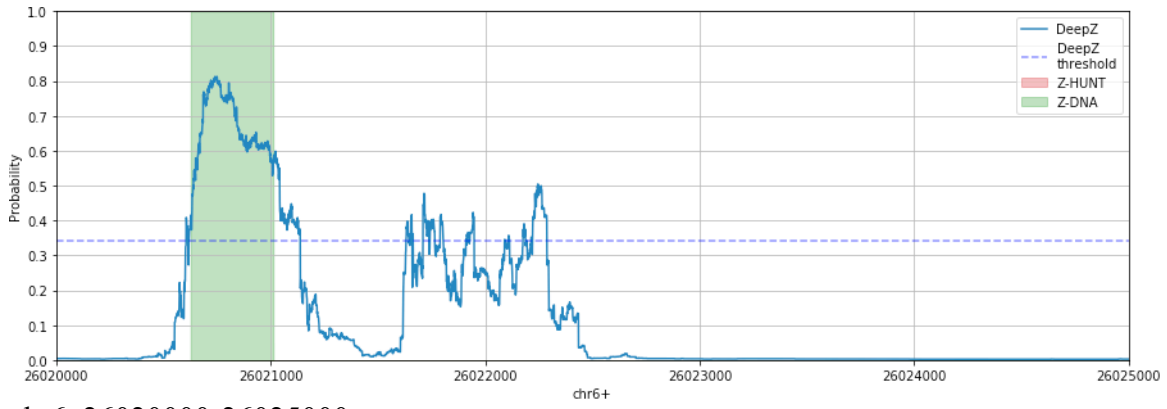

chr6\_26020000-26025000

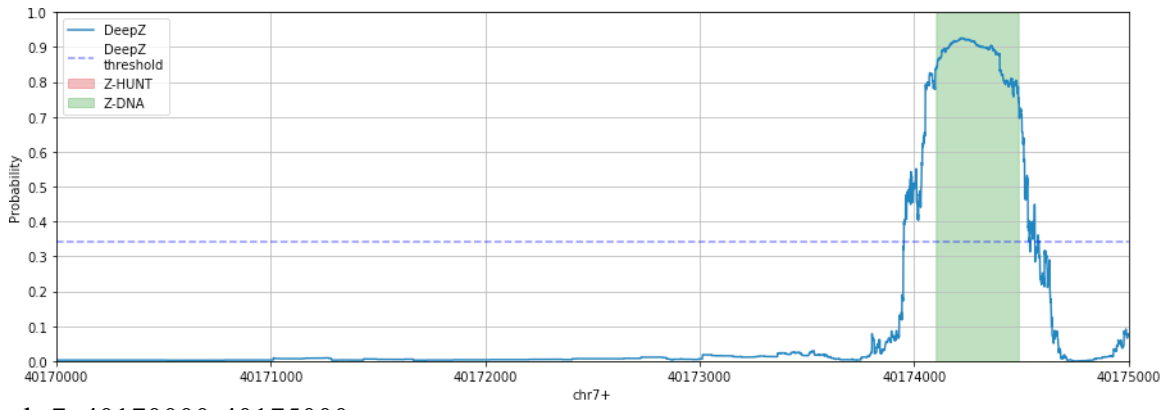

chr7\_40170000-40175000

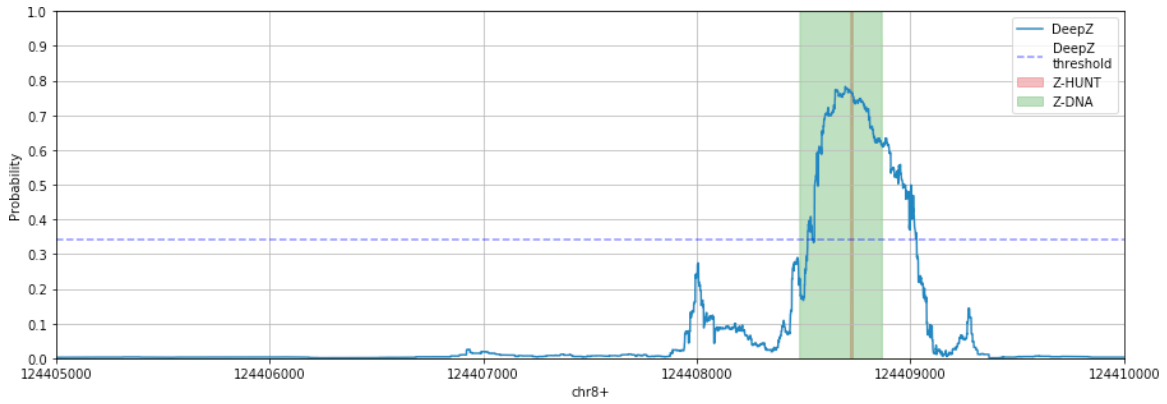

chr8\_124405000-124410000

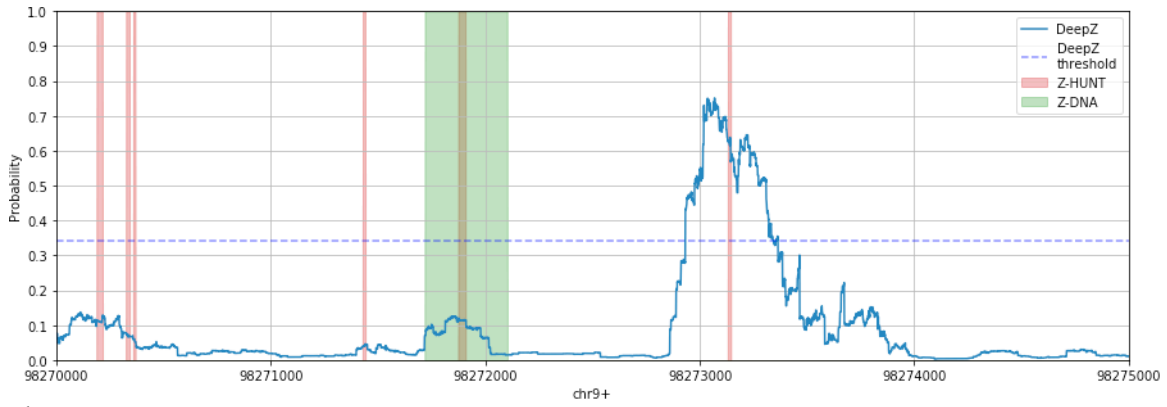

chr9\_98270000-98275000

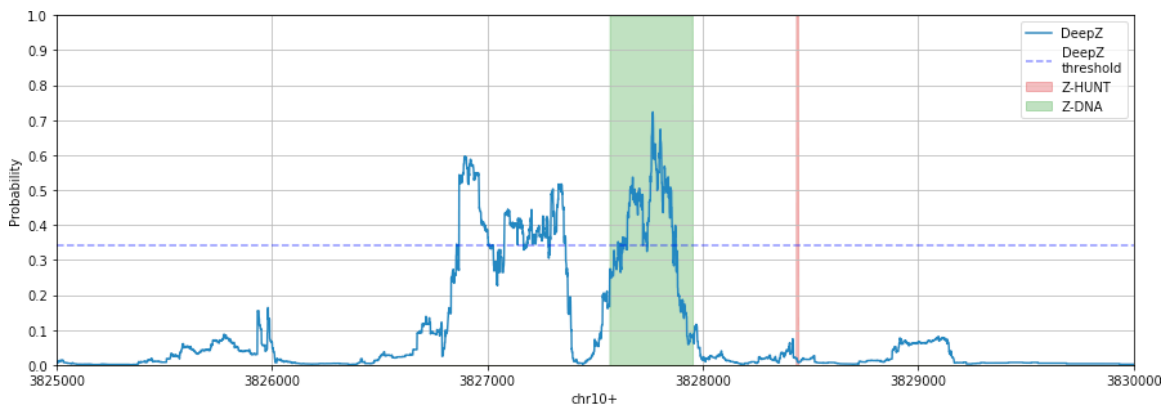

chr10\_3825000-3830000

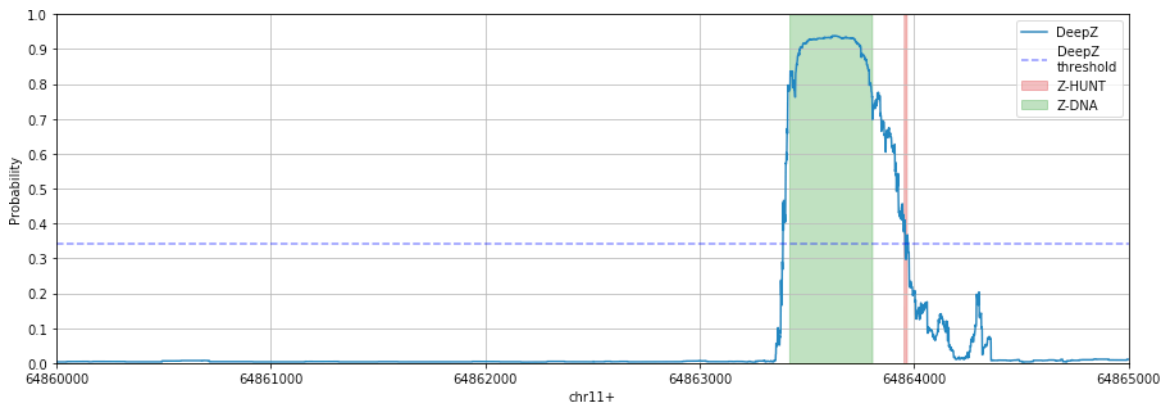

chr11\_64860000-64865000

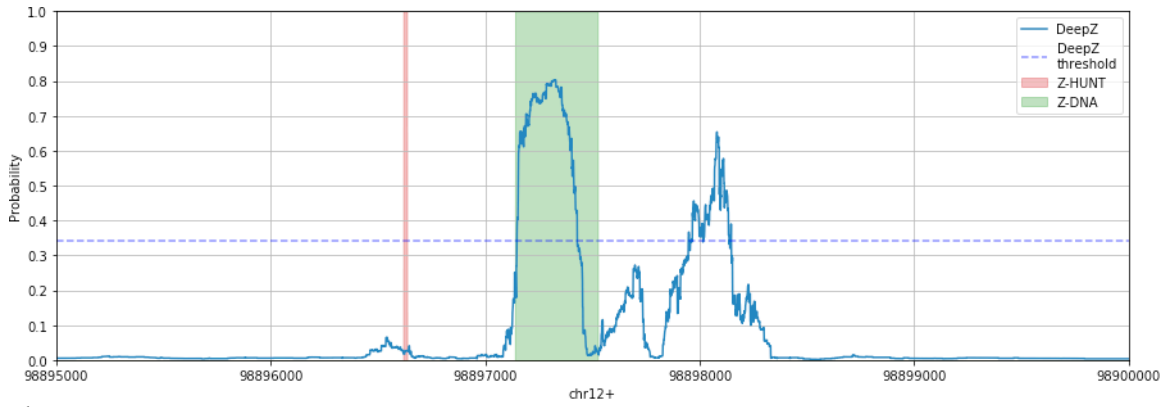

chr12\_98895000-98900000

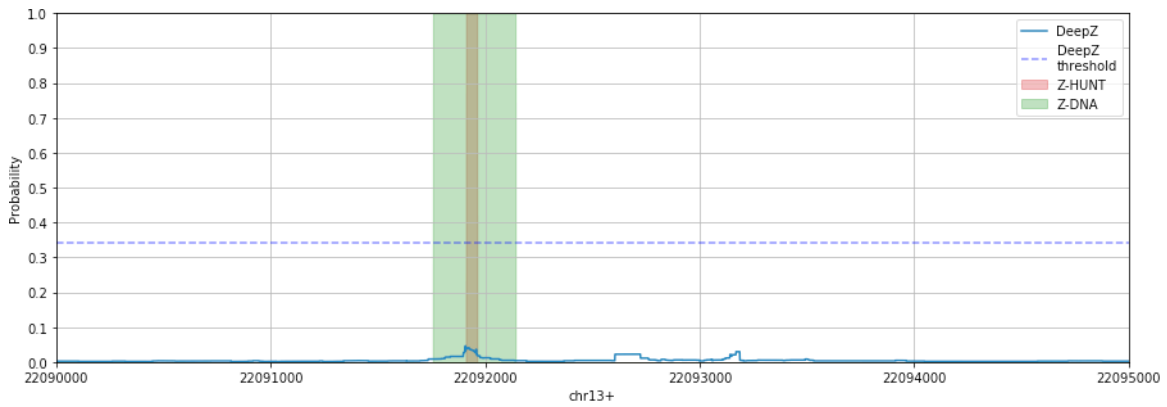

chr13\_22090000-22095000

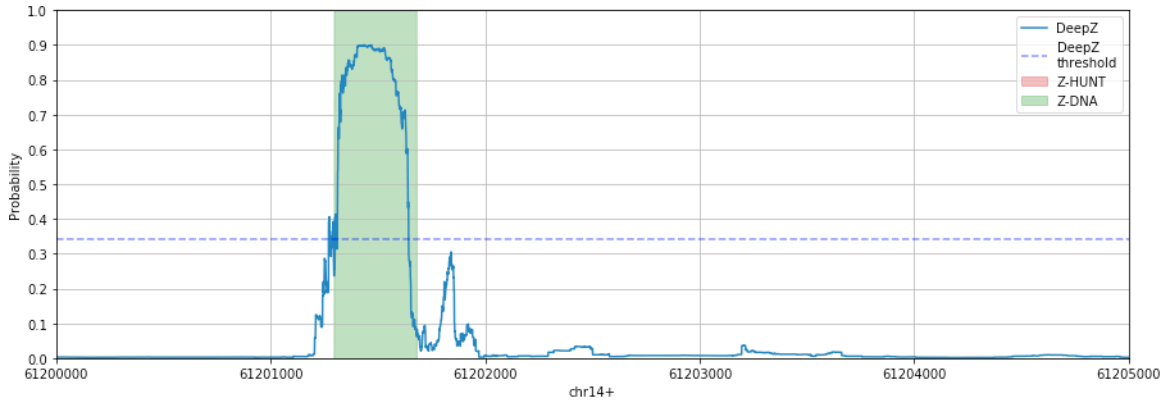

chr14\_61200000-61205000

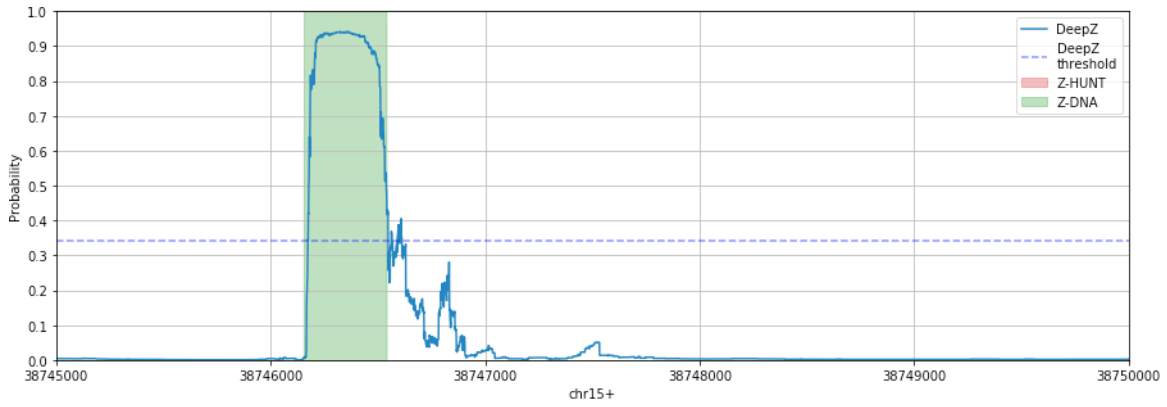

chr15\_38745000-38750000

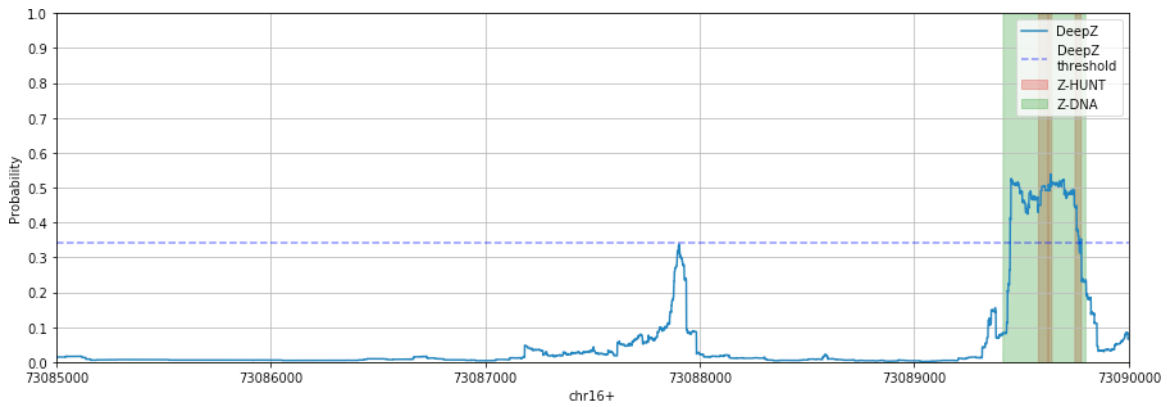

chr16\_73085000-73090000

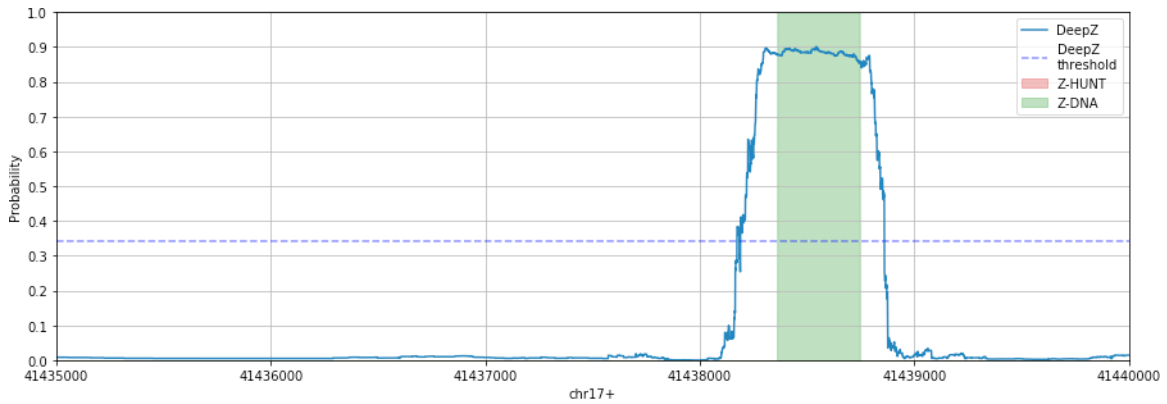

chr17\_41435000-41440000



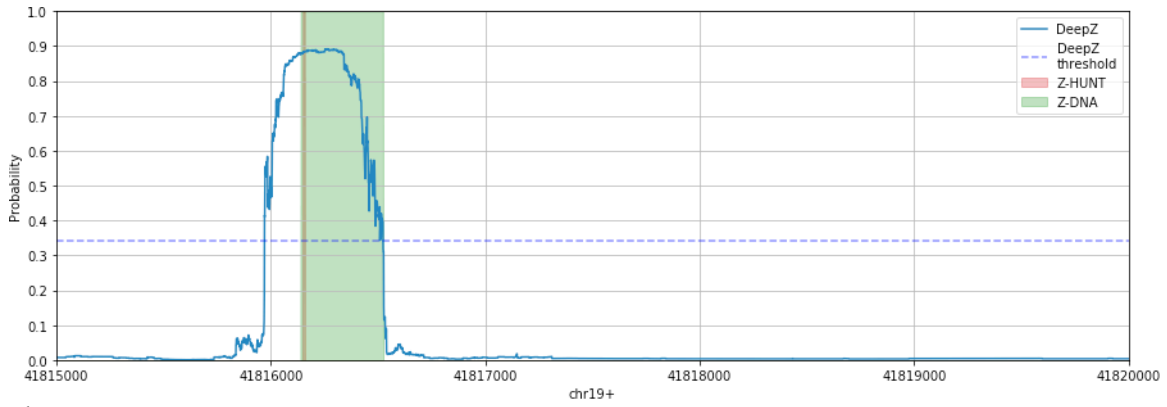

chr19\_41815000-41820000

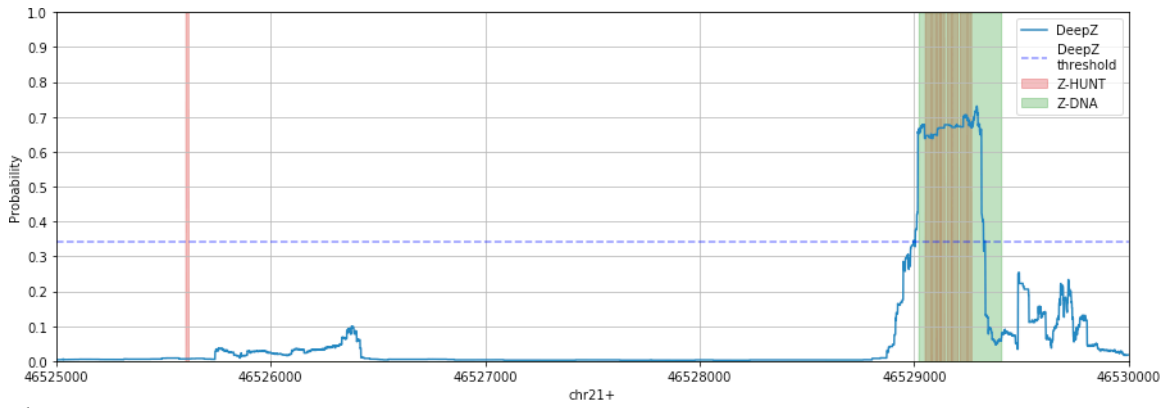

chr21\_46525000-46530000

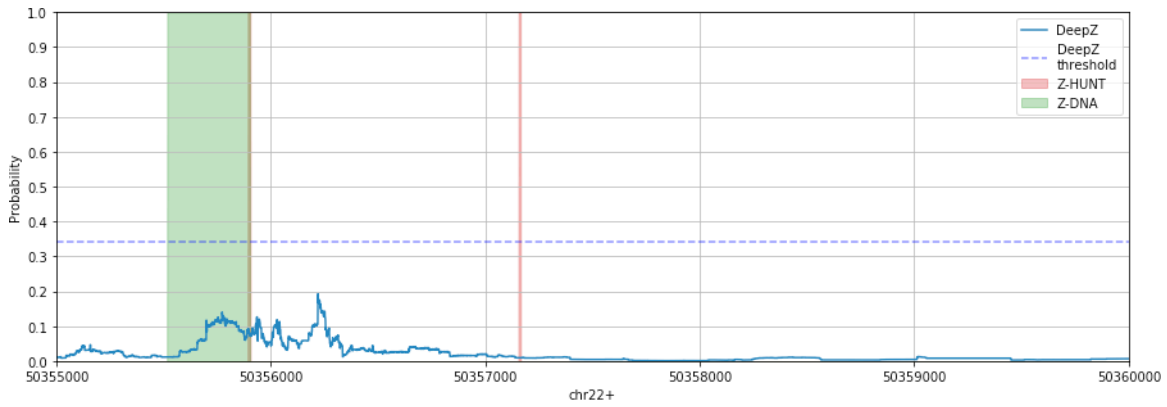

chr22\_50355000-50360000

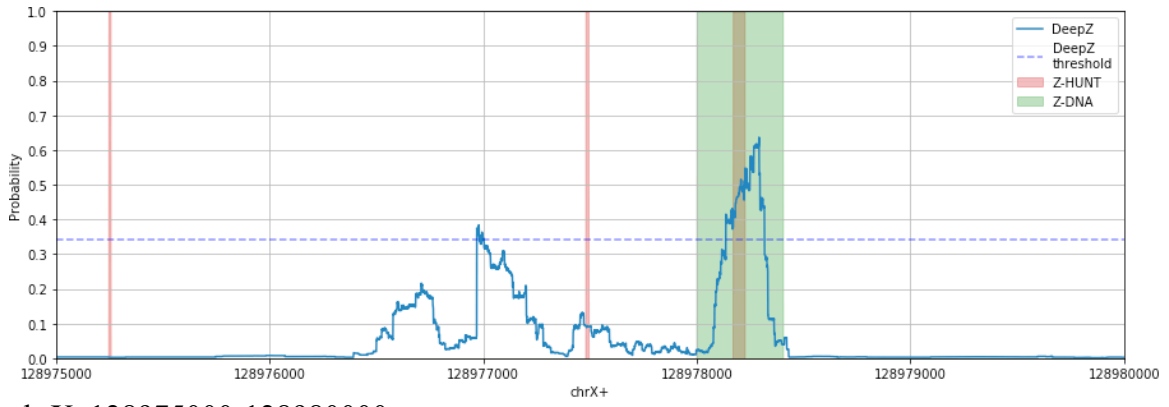

chrX\_128975000-128980000

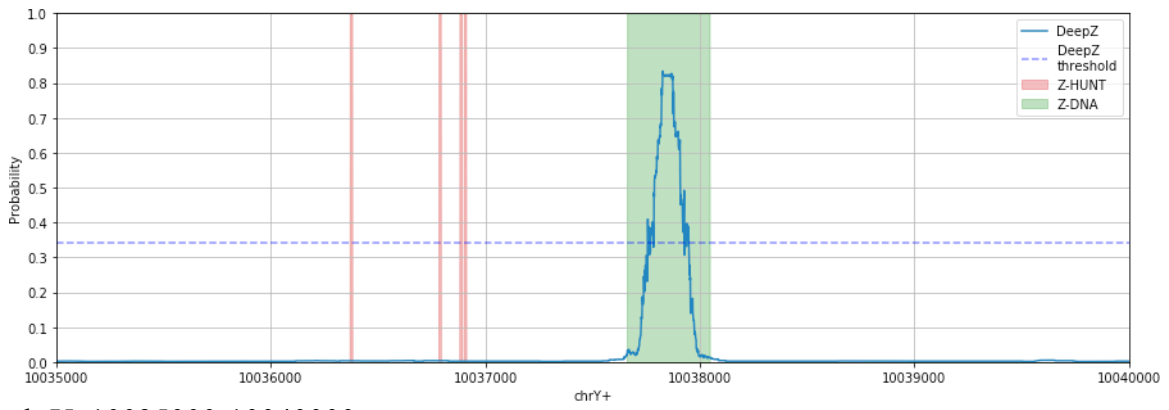

chrY\_10035000-10040000
